# Supplementary material for: Substrate specificities of Escherichia coli ItaT that acetylates aminoacyl-tRNAs
Source: PubMed Central journal article supplement — Nucleic Acids Res. 2020 Jun 5;48(13):7532–44. doi: 10.1093/nar/gkaa487 (PMC7367177; doi:10.1093/nar/gkaa487), 2020-06-05
Supplement: gkaa487_supplemental_file.pdf [file gkaa487_supplemental_file.pdf]

## **Supplementary Information**

### **Substrate specificities of *Escherichia coli* ItaT that acetylates aminoacyl-tRNAs**

Chuqiao Zhang, Yuka Yashiro, Yuriko Sakaguchi, Tsutomu Suzuki, Kozo Tomita

**Figure S1**

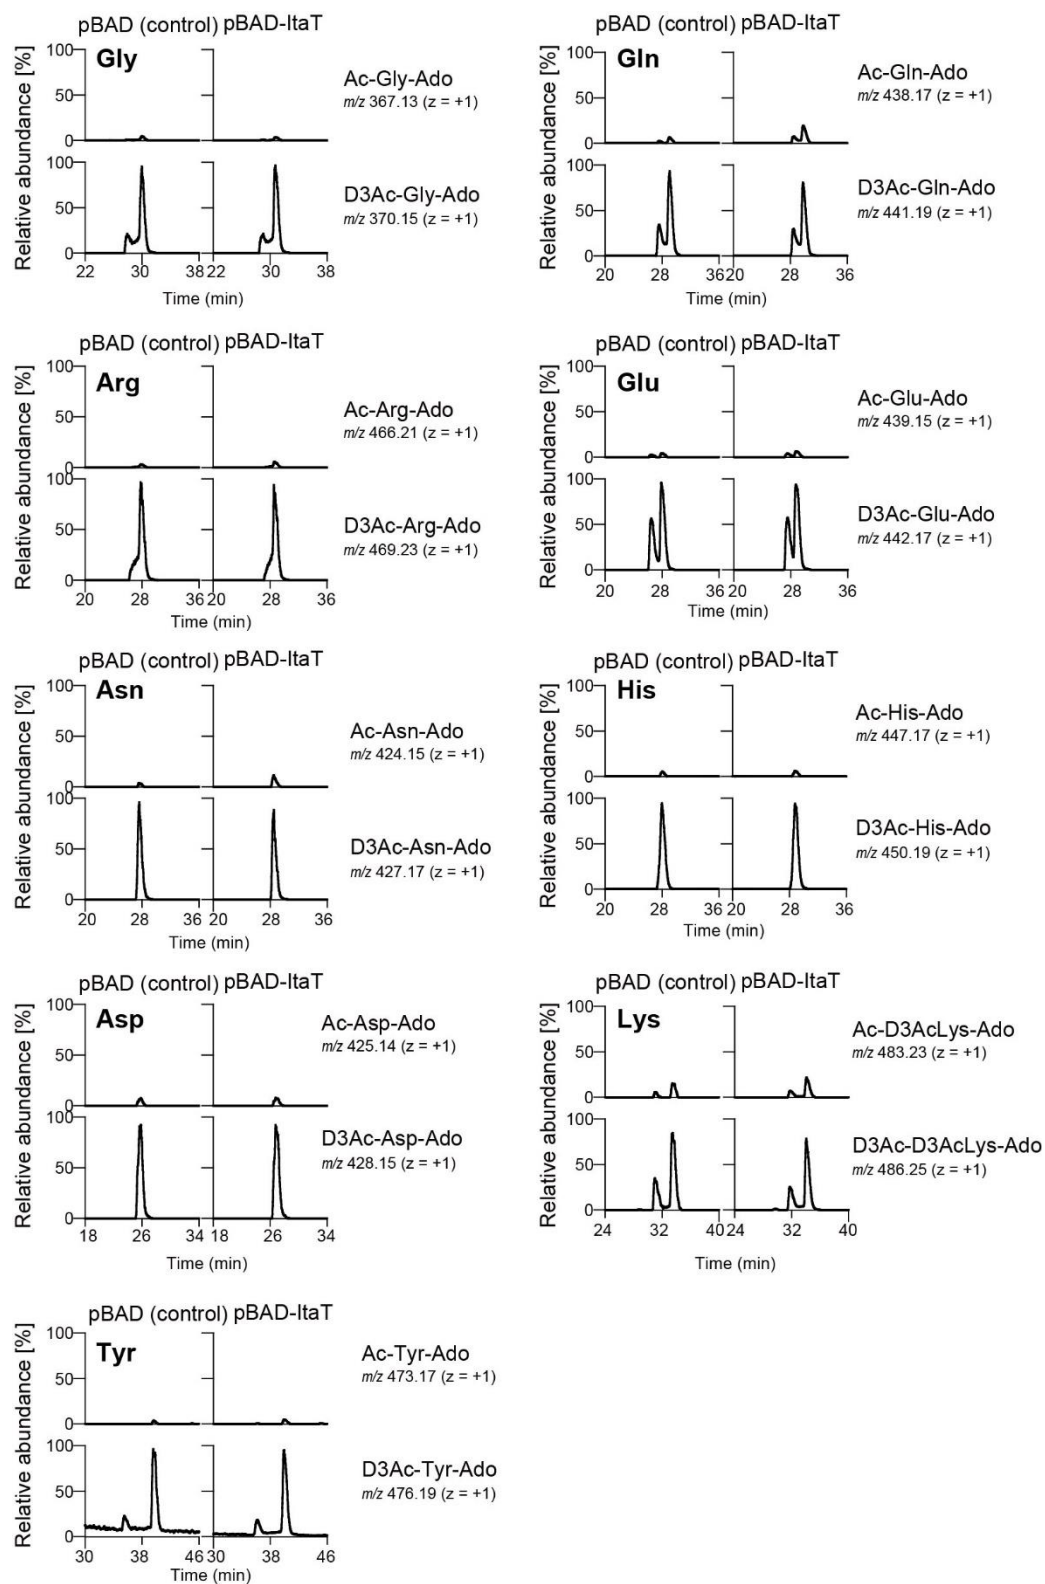

**Figure S1: LC/MS analyses of RNase I-digests of RNA prepared from *E. coli* with ItaT induction. Asterisks indicate nonspecific peaks with the same m/z value.**

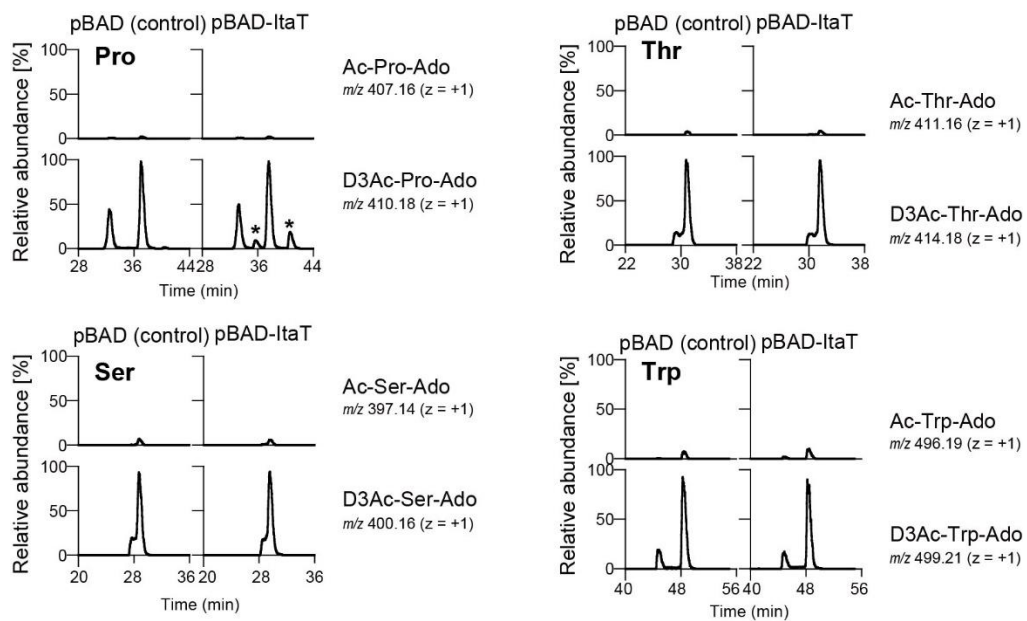

**Figure S1: Continued.**

**Figure S2**

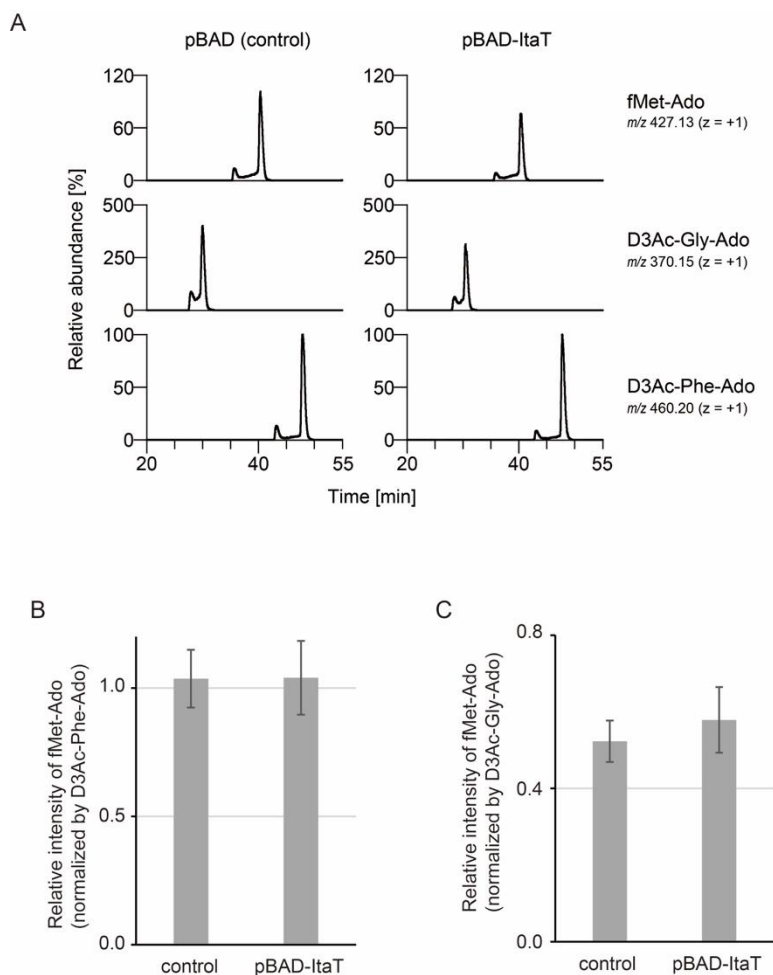

**Figure S2: Identification of *N*-formyl-Met-tRNA<sup>Met</sup>.**

(A) Identification of the molecular mass corresponding to f-Met-A76 (N-formyl methionyl-adenosine,  $m/z = 427.13$ ) in RNA preparations from *E. coli* with or without ItaT induction. The intensity of f-Met-A76 or D<sub>3</sub>Ac-Gly-A76 (control) in each sample is expressed relative to the intensity of D<sub>3</sub>Ac-Phe-A76. (B) (C) Quantification of the relative intensities of f-Met-A76. Intensity of f-Met-A76 in RNA preparations from *E. coli* with or without ItaT induction was normalized by the intensity of D<sub>3</sub>Ac-Phe-A76 (B) or D<sub>3</sub>Ac-Gly-A76 (C). The bars in the graphs are SD of duplicate for control or triplicate for ItaT from independent experiments. The amounts of f-Met-tRNA<sup>Met</sup> in the cells are not significantly altered by the ItaT induction *in vivo*.

**Figure S3**

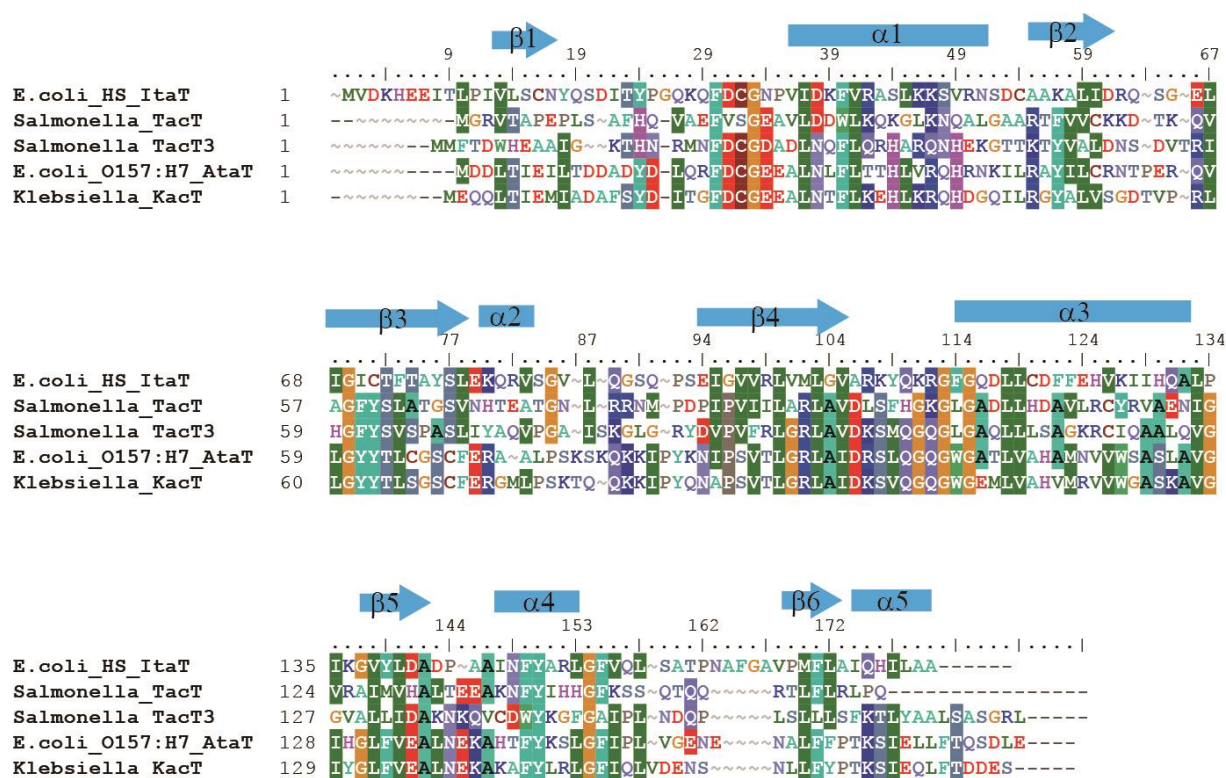

**Figure S3: Sequence alignment of type II GNAT toxins targeting aminoacyl-tRNAs.**

Amino acid sequences of *S. enterica* Typhimurium TacT, *E. coli* AtaT, *K. pneumoniae* KacT and *E. coli* ItaT are aligned. The secondary structure elements ( $\alpha$ 1- $\alpha$ 5 and  $\beta$ 1- $\beta$ 6) of ItaT are depicted above the alignment.

**Figure S4**

**A**

| tRNA | Acc-stem | D-stem | D-loop | D-stem       | Ac-stem | Ac-loop | Ac-stem | V-region | T-stem | T-loop     | T-stem | Acc-stem |       |         |    |     |
|------|----------|--------|--------|--------------|---------|---------|---------|----------|--------|------------|--------|----------|-------|---------|----|-----|
| Ile  | 1        | 8      | 10     | 14           | 22      | 26      | 27      | 32       | 39     | 44         | 49     | 53       | 61    | 66      | 73 | 74  |
| Ile  | GGCCCT   | TA     | GCTC   | AGT--GGTT-A  | GAGC    | A       | GGCGA   | CTCATAA  | TCGCT  | TG-----GTC | GCTGG  | TTCAGT   | CCAGC | AGGGGCC | A  | CCA |
| Ile  | AGGCTT   | TA     | GCTC   | AGGT--GGTT-A | GAGC    | G       | CACCC   | CTGATAA  | GGGTG  | AG-----GTC | GGTGG  | TTCAGT   | CCACT | CAGGCT  | A  | CCA |
| Metf | CGCGGG   | TG     | GAGC   | AGCCTGGT--A  | GCTC    | G       | TCGGG   | CTCATAA  | CCCGA  | AG-----GTC | GTCGG  | TTCAGT   | CCGCG | CCCCGCA | A  | CCA |
| Metm | GGCCCT   | TA     | GCTC   | AGT--GGTT-A  | GAGC    | A       | GGCGA   | CTCATAA  | TCGCT  | TG-----GTC | GCTGG  | TTCAGT   | CCAGC | AGGGGCC | A  | CCA |
| Val  | GCCTCA   | TA     | GCTC   | AGTT--GGTT-A | GAGC    | A       | CCACC   | TTGACAT  | GGTGG  | GG-----GTC | GTTGG  | TTCAGT   | CCAAT | TGACGC  | A  | CCA |
| Val  | GGGTGAT  | TA     | GCTC   | AGCT--GGG--A | GAGC    | A       | CCTCC   | CTTACAA  | GGAGG  | GG-----GTC | GGCGG  | TTCAGT   | CCGTC | ATCACCC | A  | CCA |

  

**B**

| tRNA | Acc-stem | D-stem | D-loop | D-stem       | Ac-stem | Ac-loop | Ac-stem | V-region | T-stem | T-loop          | T-stem | Acc-stem |       |         |    |     |
|------|----------|--------|--------|--------------|---------|---------|---------|----------|--------|-----------------|--------|----------|-------|---------|----|-----|
| Leu  | 1        | 8      | 10     | 14           | 22      | 26      | 27      | 32       | 39     | 44              | 49     | 53       | 61    | 66      | 73 | 74  |
| Leu  | GCCGAAG  | TG     | GCGA   | AATC--GGTA-G | ACGC    | A       | GTTGA   | TTCAAAA  | TCAAC  | CGTA-GAAA-TACGT | GCCGG  | TTCAGT   | CCGGC | CTTCGGC | A  | CCA |
| Leu  | GCGAAGG  | TG     | GCGG   | AATT--GGTA-G | ACGC    | G       | CTAGC   | TTCAGGT  | GTTAG  | TGTTCTACGGACGT  | GGGGG  | TTCAGT   | CCCC  | CCCTCGC | A  | CCA |
| Leu  | GCGAAGG  | TG     | GCGG   | AATT--GGTA-G | ACGC    | G       | CTAGC   | TTCAGGT  | GTTAG  | TGTCCCTACGGACGT | GGGGG  | TTCAGT   | CCCC  | CCCTCGC | A  | CCA |
| Leu  | GCCGAGG  | TG     | GTGG   | AATT--GGTA-G | ACAC    | G       | CTACC   | TTGAGGT  | GGTAG  | TGCCAATAGGGCTT  | ACGGG  | TTCAGT   | CCCGT | CCTCGGT | A  | CCA |
| Leu  | GCCCAGA  | TG     | GTGG   | AATC--GGTA-G | ACAC    | A       | AGGGA   | TTTAAAA  | TCCCT  | CGCGTTCGCGTGT   | GCCGG  | TTCAGT   | CCGCG | TCGGGT  | A  | CCA |
| Leu  | GCGGAG   | TG     | GCGA   | AATT--GGTA-G | ACGC    | A       | CCAGA   | TTTAGST  | TCTGG  | CGCC-GCAA-GGTGT | GCGAG  | TTCAGT   | CTCGC | CTCCGC  | A  | CCA |
| Phe  | GCCGGA   | TA     | GCTC   | AGTC--GGT--A | GAGC    | A       | GGGGA   | TTGAAA   | TCCCC  | GT-----GTC      | CTTGG  | TTCAGT   | CCGAG | TCGGGC  | A  | CCA |
| Ala  | GGGGCTA  | TA     | GCTC   | AGCT--GGG--A | GAGC    | G       | CTTGC   | ATGGCAT  | GCAAG  | AG-----GTC      | AGCGG  | TTCAGT   | CCGCT | TAGCTCC | A  | CCA |
| Ala  | GGGCTA   | TA     | GCTC   | AGCT--GGG--A | GAGC    | G       | CCTGC   | TTTGAC   | GCAGG  | AG-----GTC      | TGCGG  | TTCAGT   | CCGCA | TAGCTCC | A  | CCA |

**Figure S4: Sequence alignment of tRNA isoacceptor genes.**

(A) tRNA<sup>Ile</sup>, tRNA<sup>Val</sup> and tRNA<sup>Met</sup>. Metf and Metm are initiator tRNA<sup>fMet</sup> and elongator tRNA<sup>mMet</sup>, respectively. (B) tRNA<sup>Leu</sup>, tRNA<sup>Phe</sup> and tRNA<sup>Ala</sup>.

**Table S1: Sequences of synthetic genes**

|                                                                                                                                                                                                                                                                                                                                                                                                                                                                                                                                                                                                                                                                                                                                                                                                                                                                                                                                                                                         |
|-----------------------------------------------------------------------------------------------------------------------------------------------------------------------------------------------------------------------------------------------------------------------------------------------------------------------------------------------------------------------------------------------------------------------------------------------------------------------------------------------------------------------------------------------------------------------------------------------------------------------------------------------------------------------------------------------------------------------------------------------------------------------------------------------------------------------------------------------------------------------------------------------------------------------------------------------------------------------------------------|
| <p><b>ItaR-ItaT gene:</b><br/>catATGCCTGGAAAAACAGCCACTCTACCCGATGTCGATAAAAACGCTGAAAAATGCGC<br/>GGGTCGAACTCAAACCTAGTCCCGACGCCAAAAACAACTTCGTGAAGCTGCGCAAG<br/>CCGTTGGGGTAGATTTAAGCGCTTTTATTTTGAGCGCTGCTATGGAACGCGCCGAAAG<br/>TGTGCTTGATAACCAACGTCGCCGTGAGCTTTCGAATCAAAGCTGGGAACTGATGAAC<br/>CAACTCATCGCTGAACCTGCTCAACCGACGCTCGCCCTCAAGGCGTTAATGAAAAGG<br/>AAAAACAGCGATGGTCGACAAGCATGAAGAGATTACTCTGCCCATAGTCCTCTCCTGT<br/>AATTATCAGTCTGATATTACTTATCCTGGGCAAAAACAGTTTGATTGCGGTAACCCTG<br/>TTATCGATAAATTTGTACGCGCATCGCTAAAGAAAAGTGTGCGTAATAGCGACTGTGC<br/>GGCTAAAGCACTTATTGACAGACAAAGTGGTGAACCTGATCGGCATCTGTACTTTTACG<br/>GCATATTCGCTGGAAAAACAACGCGTTTCTGGCGTCCTTCAGGGTTCACAACCTTCAG<br/>AAATTGGTGTGTGTCAGATTAGTCATGTTGGGGGTAGCACGGAAGTATCAAAGCGGG<br/>GCTTTGGTCAGGACCTACTATGTGATTTTTTTTGAACATGTAAAAATAATTCACCAGGC<br/>ATTACCAATTAAGGGGTTTATCTTGATGCTGACCCTGCCGCCATTAATTTTTATGCTC<br/>GTCTCGGCTTTGTTTCAGCTTTCAGCGACACCAAATGCTTTTGGTGCTGTACCTATGTTT<br/>TTGGCGATTACGCATATTCTCGCGGCTtctcgag</p> |
| <p><b>tRNA<sup>Phe</sup> gene:</b><br/>GCCC GGATAGCTCAGTCGGTAGAGCAGGGGATTGAAAATCCCCGTGTCCTTGGTTCGA<br/>TTCCGAGTCCGGGCACCA</p>                                                                                                                                                                                                                                                                                                                                                                                                                                                                                                                                                                                                                                                                                                                                                                                                                                                           |
| <p><b>tRNA<sup>Ala</sup> gene:</b><br/>GGGGCTATAGCTCAGCTGGGAGAGCGCTTGCATGGCATGCAAGAGGtCAGCGGTTCGA<br/>TCCCGCTTAGCTCCACCA</p>                                                                                                                                                                                                                                                                                                                                                                                                                                                                                                                                                                                                                                                                                                                                                                                                                                                            |
| <p><b>tRNA<sup>Leu</sup> gene:</b><br/>GCCC GGATGGTGGAAATCGGTAGACACAAGGGATTTAAAATCCCTCGGCGTTCGCGCT<br/>GTGCGGGTTCAAGTCCCGCTCCGGGTACCA</p>                                                                                                                                                                                                                                                                                                                                                                                                                                                                                                                                                                                                                                                                                                                                                                                                                                               |

**Table S2: Sequences of oligonucleotides**

|                           |                                    |
|---------------------------|------------------------------------|
| isoS_fw for IRS           | AGCTAGCTCATATGAGTGACTATAAATCAACCC  |
| isoS_rv for IRS           | AGCTCTCGAGGGCAAACCTTACGTTTTTCACC   |
| ItaT_fw_NdeI for pET/pBAD | ATACATATGGTTCGACAAGCATGAAGAGATTAC  |
| ItaT_rv_XhoI for pET      | CCGCTCGAGAGCCGCGAGAATATGCTG        |
| ItaT_rv_HindIII for pBAD  | CCCAAGCTTTC AAGCCGCGAGAATATGCTG    |
| ItaR_fw_NdeI for pET      | AGCTGACATATGCCTGGAAAAACAGC         |
| ItaT_R115D_fw             | GATCAGGACCTACTATGTGATTTTTTTGAAC    |
| ItaT_R115D_rv             | AAAGCCCCGCTTTTGATACTTCC            |
| ItaT_N34A_FW              | GCG CCTGTTATCGATAAATTTGTACGCGC     |
| ItaT_N34A_RV              | ACCGCAATCAAACCTGTTTTTGCCC          |
| ItaT_V36A/I37A_FW         | GCGGCG GATAAATTTGTACGCGCATCGCTAAAG |
| ItaT_V36G/I37G_FW         | GGCGGC GATAAATTTGTACGCGCATCGCTAAAG |
| ItaT_V36D/I37D_FW         | GATGAT GATAAATTTGTACGCGCATCGCTAAAG |
| ItaT_V36D/I37D_RV         | AGGGTTACCGCAATCAAACCTGTTTTG        |
| ItaT_K39A_FW              | GCG TTTGTACGCGCATCGCTAAAGAAAAGTGTG |
| ItaT_K39A/F40A_FW         | GCGGCG GTACGCGCATCGCTAAAGAAAAGTGTG |
| ItaT_K39A/F40A_RV         | ATCGATAACAGGGTTACCGCAATC           |
| ItaT_R42A_FW              | GCG GCATCGCTAAAGAAAAGTGTGCG        |
| ItaT_R42A_RV              | TACAAATTTATCGATAACAGGGTTACC        |
| ItaT_K46A/K47A_FW         | GCGGCTAGTGTGCGTAATAGCGACTGTGCGGC   |
| ItaT_K46A/K47A_RV         | TAGCGATGCGCGTACAAATTTATCG          |
| ItaT_R50A_FW              | GCG AATAGCGACTGTGCGGCTAAAGCAC      |
| ItaT_R50A_RV              | CACACTTTTCTTTGACGATGCGCG           |
| ItaT_K80A_FW              | GCG CAACGCGTTTCTGGCGTCCTTCAGGG     |
| ItaT_K80A_RV              | AAGATAAACCCCTTTAATTGGTAATG         |
| ItaT_R82A_FW              | GCG GTTTCTGGCGTCCTTCAGGGTTCAC      |
| ItaT_R82A_RV              | TTGTTTTTCCAGCGAATATGCCG            |
| ItaT_M102A_FW             | GCG TTGGGGGTAGCACGGAAGTATCAAAG     |
| ItaT_M102R_FW             | CGC TTGGGGGTAGCACGGAAGTATCAAAG     |
| ItaT_M102A_RV             | GACTAATCTGACAACACCAATTTCTG         |
| ItaT_Y150F_FW             | TTT GCTCGTCTCGGCTTTGTTTCAGCTTTC    |
| ItaT_Y150F_RV             | AAAATTAATGGCGGCAGGGTCAGC           |
| ItaT_F40A_FW              | GCG GTACGCGCATCGCTAAAGAAAAGTGTG    |
| ItaT_F40A_RV              | TTTATCGATAACAGGGTTACCGCAATC        |
| ItaT_L133E_FW             | GAACCAATTAAGGGGTTTATCTTGATGCTGA    |
| ItaT_L133E_RV             | TGCCTGGTGAATTATTTTTACATGTTT        |
